# Supplementary material for: Acute Kidney Injury Following Chimeric Antigen Receptor T-Cell Therapy for B-Cell Lymphoma in a Kidney Transplant Recipient
Source: PubMed Central journal article supplement — Kidney Med. 2021 May 28;3(4):665–8. doi: 10.1016/j.xkme.2021.03.011 (PMC8350835; doi:10.1016/j.xkme.2021.03.011), 2021-05-28

Figure S1. Hematoxylin and eosin stain of kidney tissue. BANFF score was compatible with borderline changes (g0, i1-2, ti1-2, i-IFTA1-2, t1, v 0, ptc0, ah3, aah3, cg0, ci0, ct0, cv0, mm0).

A

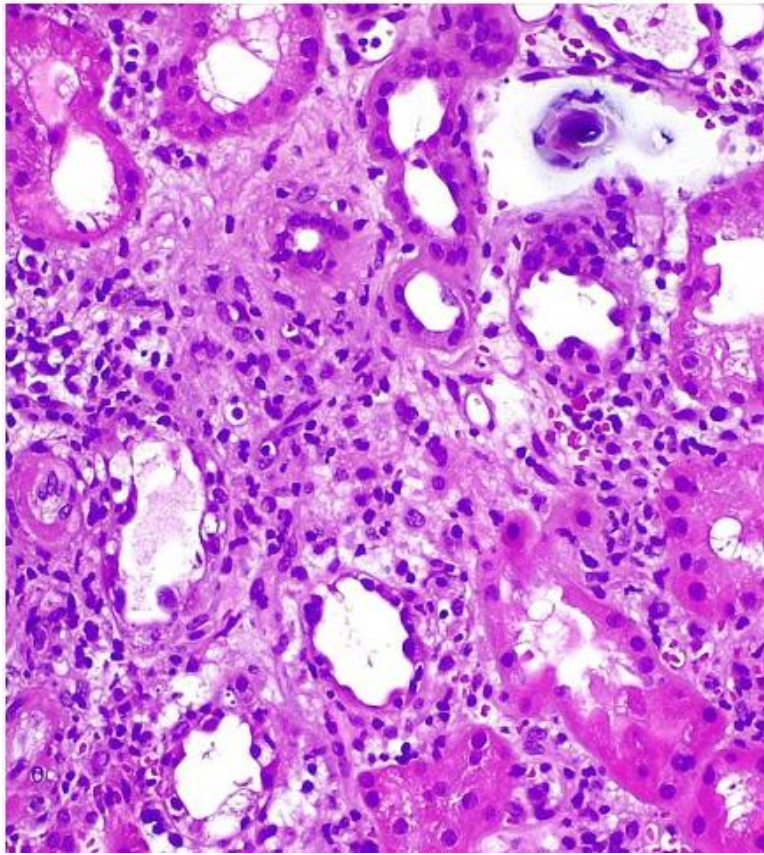

B

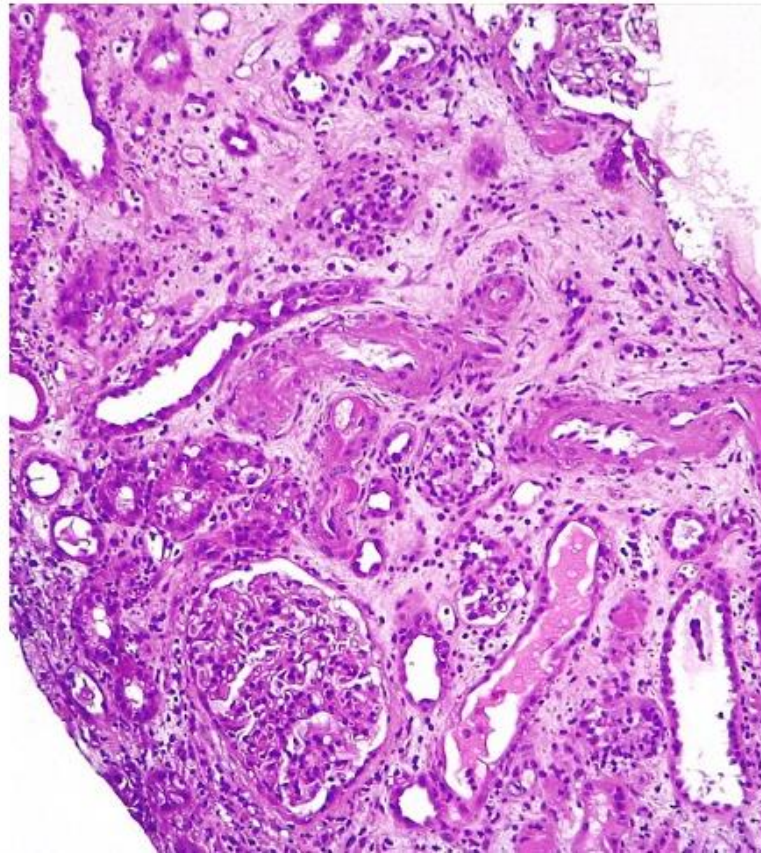

Supplement: mmc1.pdf [file mmc1.pdf]
